# Supplementary material for: The Anaesthetic Biobank of Cerebrospinal fluid: a unique repository for neuroscientific biomarker research
Source: PubMed Central journal article supplement — Ann Transl Med. 2021 Mar;9(6):455. doi: 10.21037/atm-20-4498 (PMC8039635; doi:10.21037/atm-20-4498), 2021-03
Supplement: atm-09-06-455-supplementary.pdf [file atm-09-06-455-supplementary.pdf]

| Neurological assessment       | Normal             |                 | Abnormal      |                   | Not tested    |                   |
|-------------------------------|--------------------|-----------------|---------------|-------------------|---------------|-------------------|
| <b>Cranial nerve function</b> | <b>168</b>         |                 |               |                   |               |                   |
| Visual field                  | 209                |                 | 11            |                   | 0             |                   |
| Eye inspection                | 211                |                 | 9             |                   | 0             |                   |
| Pupil reflexes                | 216                |                 | 4             |                   | 0             |                   |
| Eye movement                  | 210                |                 | 9             |                   | 1             |                   |
| Hearing                       | 184                |                 | 36            |                   | 0             |                   |
| Facial sensation              | 219                |                 | 1             |                   | 0             |                   |
| Facial strength               | 220                |                 | 0             |                   | 0             |                   |
| Facial expressions            | 218                |                 | 2             |                   | 0             |                   |
| Palatal movement              | 220                |                 | 0             |                   | 0             |                   |
| Shoulder/neck strength        | 217                |                 | 3             |                   | 0             |                   |
| Tongue movement/strength      | 219                |                 | 1             |                   | 0             |                   |
| <b>Motor function</b>         | <b>154</b>         |                 |               |                   |               |                   |
| Upper extremity strength      | 204                |                 | 16            |                   | 0             |                   |
| Lower extremity strength      | 160                |                 | 59            |                   | 1             |                   |
| Pronator drift                | 216                |                 | 3             |                   | 1             |                   |
| <b>Sensory function</b>       | <b>128</b>         |                 |               |                   |               |                   |
| Sensation in extremities      | 132                |                 | 88            |                   | 0             |                   |
| Romberg                       | 204                |                 | 11            |                   | 5             |                   |
| <b>Coordination</b>           | <b>187</b>         |                 |               |                   |               |                   |
| Finger tapping                | 210                |                 | 9             |                   | 1             |                   |
| Rapid alternating movement    | 209                |                 | 10            |                   | 1             |                   |
| Finger-nose test              | 214                |                 | 6             |                   | 0             |                   |
| Heel-shin test                | 204                |                 | 12            |                   | 4             |                   |
| <b>Gait</b>                   | <b>154</b>         |                 | 59            |                   | 7             |                   |
| <b>Reflexes</b>               | <b>79</b>          |                 |               |                   |               |                   |
| <b>Reflexes</b>               | <b>Absent</b>      | <b>Reduced</b>  | <b>Normal</b> | <b>Increased</b>  | <b>Clonus</b> | <b>Not tested</b> |
| Biceps                        |                    |                 |               |                   |               |                   |
| Right                         | 19                 | 9               | 189           | 1                 | 0             | 2                 |
| Left                          | 19                 | 10              | 188           | 1                 | 0             | 2                 |
| Triceps                       |                    |                 |               |                   |               |                   |
| Right                         | 63                 | 21              | 132           | 1                 | 0             | 3                 |
| Left                          | 62                 | 19              | 136           | 1                 | 0             | 2                 |
| Knee                          |                    |                 |               |                   |               |                   |
| Right                         | 26                 | 17              | 166           | 5                 | 0             | 6                 |
| Left                          | 26                 | 13              | 172           | 7                 | 0             | 2                 |
| Heel                          |                    |                 |               |                   |               |                   |
| Right                         | 61                 | 15              | 137           | 2                 | 0             | 5                 |
| Left                          | 61                 | 14              | 142           | 2                 | 0             | 1                 |
| Plantar                       | <b>Indifferent</b> | <b>Abnormal</b> | <b>Normal</b> | <b>Not tested</b> |               |                   |
| Right                         | 74                 | 7               | 134           | 5                 |               |                   |
| Left                          | 74                 | 7               | 138           | 1                 |               |                   |

**Figure S1** Neurological examination (n=220). Data are number of patients. For the main aspects (cranial nerve function, motor function, sensory function, coordination, gait and reflexes), number of patients with normal results for all items for that area are listed.
